# Supplementary material for: Treatment Outcomes and Costs of Providing Antiretroviral Therapy at a Primary Health Clinic versus a Hospital-Based HIV Clinic in South Africa
Source: PubMed Central journal article supplement (PMC5152901; doi:10.1371/journal.pone.0168118), 2016-12-12

## PHC FACILITY

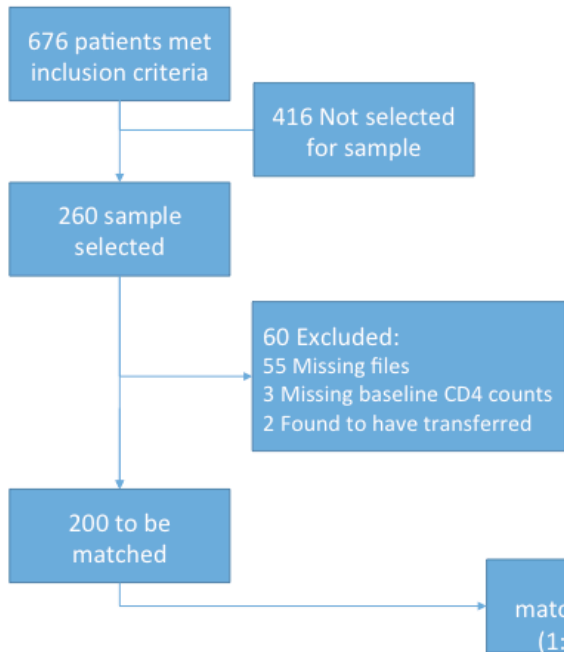

## HIV OUTPATIENT FACILITY

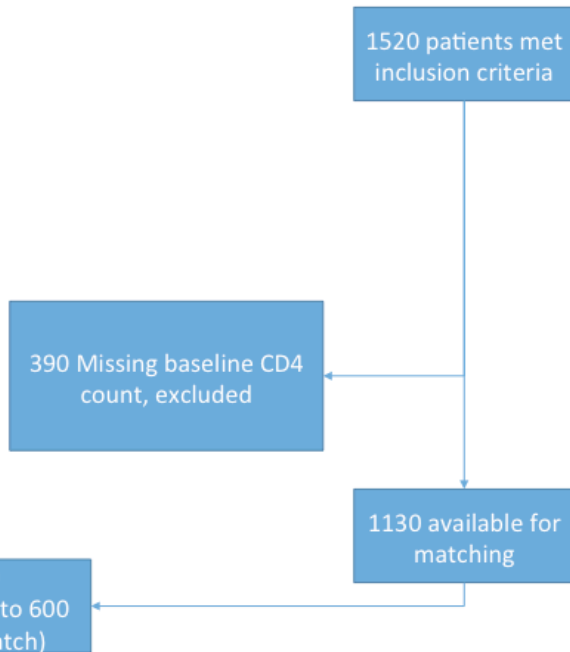

Supplement: pone.0168118.s001.pdf [file pone.0168118.s001.pdf]
